# Supplementary material
Source: MDPI journal article supplement (https://www.mdpi.com/2073-4433/14/1/27)
Supplement: s1 [file s1 › atmosphere-2065248-supplementary.pdf]

Supplementary Materials

# Hourly Valley Concentration of Air Pollutants Associated with Increased Acute Myocardial Infarction Hospital Admissions in Beijing, China

Jia Fu, Yanbo Liu, Yakun Zhao, Siqi Tang, Yuxiong Chen, Yijie Liu, Yitao Han and Zhongjie Fan

**Table S1.** The excess risk (%) and 95% confidence interval in AMI hospital admissions for per 10 units increase in hourly peak, mean and valley concentration of six kinds of air pollutants in different lag days among the total population in Beijing, China.

| Variable                 | LAG0                | LAG1                | LAG2               | LAG3               | LAG01               | LAG02               | LAG03               |
|--------------------------|---------------------|---------------------|--------------------|--------------------|---------------------|---------------------|---------------------|
| PM <sub>2.5</sub> valley | 0.5 (0.35–0.66)     | 0.36 (0.22–0.5)     | 0.13 (0–0.26)      | 0 (–0.13–0.13)     | 0.63 (0.46–0.81)    | 0.6 (0.4–0.79)      | 0.53 (0.32–0.74)    |
| PM <sub>2.5</sub> mean   | 0.43 (0.3–0.55)     | 0.28 (0.17–0.38)    | 0.11 (0–0.21)      | –0.02 (–0.12–0.08) | 0.44 (0.31–0.57)    | 0.41 (0.27–0.55)    | 0.33 (0.17–0.48)    |
| PM <sub>2.5</sub> peak   | 0.25 (0.17–0.34)    | 0.17 (0.1–0.25)     | 0.07 (–0.01–0.14)  | –0.01 (–0.09–0.06) | 0.27 (0.18–0.36)    | 0.24 (0.15–0.34)    | 0.21 (0.1–0.32)     |
| PM <sub>10</sub> valley  | 0.44 (0.32–0.56)    | 0.28 (0.16–0.4)     | 0.09 (–0.02–0.21)  | –0.06 (–0.17–0.06) | 0.51 (0.37–0.65)    | 0.48 (0.33–0.64)    | 0.41 (0.24–0.59)    |
| PM <sub>10</sub> mean    | 0.3 (0.21–0.39)     | 0.18 (0.1–0.27)     | 0.05 (–0.03–0.14)  | –0.04 (–0.12–0.05) | 0.3 (0.2–0.4)       | 0.27 (0.16–0.38)    | 0.2 (0.08–0.33)     |
| PM <sub>10</sub> peak    | 0.11 (0.06–0.16)    | 0.08 (0.03–0.13)    | 0.01 (–0.04–0.06)  | –0.01 (–0.06–0.04) | 0.13 (0.07–0.19)    | 0.12 (0.05–0.19)    | 0.11 (0.03–0.18)    |
| NO <sub>2</sub> valley   | 0.84 (0.47–1.22)    | 0.89 (0.53–1.24)    | 0.33 (0–0.66)      | –0.09 (–0.42–0.24) | 1.36 (0.9–1.83)     | 1.37 (0.87–1.89)    | 1.16 (0.61–1.71)    |
| NO <sub>2</sub> mean     | 0.87 (0.54–1.2)     | 0.79 (0.47–1.1)     | 0.29 (–0.01–0.59)  | –0.23 (–0.53–0.07) | 1.11 (0.73–1.49)    | 1.09 (0.67–1.5)     | 0.77 (0.32–1.22)    |
| NO <sub>2</sub> peak     | 0.7 (0.45–0.95)     | 0.57 (0.32–0.82)    | 0.15 (–0.1–0.39)   | –0.19 (–0.44–0.05) | 0.8 (0.52–1.08)     | 0.72 (0.41–1.02)    | 0.56 (0.23–0.88)    |
| SO <sub>2</sub> valley   | 1.86 (0.73–3.01)    | 2.51 (1.39–3.63)    | –0.23 (–1.32–0.87) | –1 (–2.1–0.11)     | 3.14 (1.79–4.51)    | 2.55 (1.02–4.11)    | 1.78 (0.1–3.49)     |
| SO <sub>2</sub> mean     | 1.05 (0.33–1.77)    | 1.28 (0.58–2)       | 0.05 (–0.65–0.75)  | –0.55 (–1.25–0.16) | 1.56 (0.74–2.38)    | 1.28 (0.38–2.19)    | 0.91 (–0.06–1.9)    |
| SO <sub>2</sub> peak     | 0.47 (0.05–0.9)     | 0.61 (0.19–1.04)    | 0.13 (–0.29–0.56)  | –0.12 (–0.55–0.31) | 0.73 (0.23–1.22)    | 0.67 (0.12–1.21)    | 0.55 (–0.04–1.14)   |
| CO valley                | 44.6 (28.99–62.1)   | 33.86 (20.77–48.37) | 10.87 (0.55–22.25) | 3.64 (–6.08–14.37) | 60.72 (41.12–83.05) | 54.41 (34.31–77.53) | 47.83 (27.45–71.45) |
| CO mean                  | 37.5 (25.37–50.8)   | 21.46 (12.04–31.68) | 7.57 (–0.5–16.29)  | –0.07 (–7.67–8.16) | 37.05 (24.25–51.16) | 31.42 (18.49–45.77) | 23.49 (10.59–37.9)  |
| CO peak                  | 23.64 (16.28–31.46) | 11.95 (5.7–18.57)   | 4.22 (–1.59–10.37) | –0.29 (–5.9–5.65)  | 22.27 (14.38–30.71) | 18.98 (10.8–27.76)  | 15.76 (7.35–24.84)  |
| O <sub>3</sub> valley    | –0.34 (–0.74–0.06)  | –0.47 (–0.86–0.09)  | –0.33 (–0.72–0.05) | –0.14 (–0.53–0.24) | –0.62 (–1.1–0.14)   | –0.74 (–1.28–0.2)   | –0.72 (–1.3–0.13)   |
| O <sub>3</sub> mean      | –0.01 (–0.29–0.27)  | –0.36 (–0.61–0.11)  | –0.28 (–0.52–0.05) | –0.44 (–0.67–0.2)  | –0.28 (–0.58–0.03)  | –0.39 (–0.71–0.07)  | –0.54 (–0.87–0.2)   |
| O <sub>3</sub> peak      | 0.08 (–0.07–0.22)   | –0.12 (–0.25–0.02)  | –0.13 (–0.26–0)    | –0.24 (–0.37–0.11) | –0.04 (–0.21–0.13)  | –0.12 (–0.3–0.06)   | –0.22 (–0.41–0.03)  |

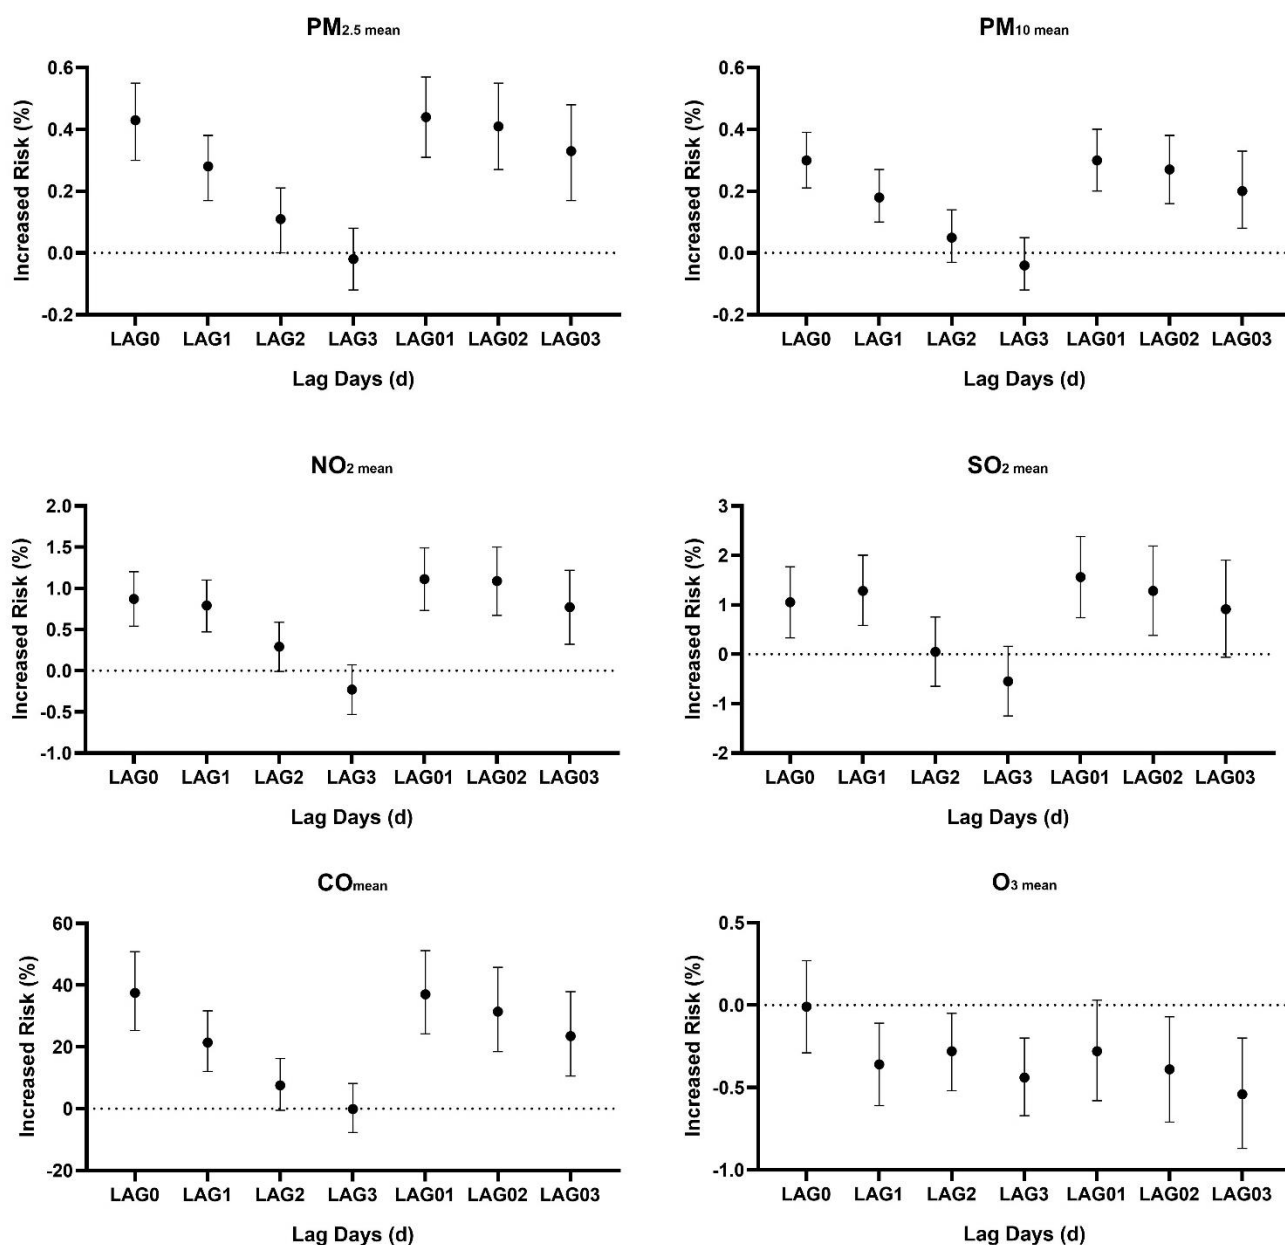

**Figure S1.** The excess risk (%) and 95% confidence interval in AMI hospital admissions for per 10 units increase in hourly mean concentration of six kinds of air pollutants in different lag days among the total population in Beijing, China.

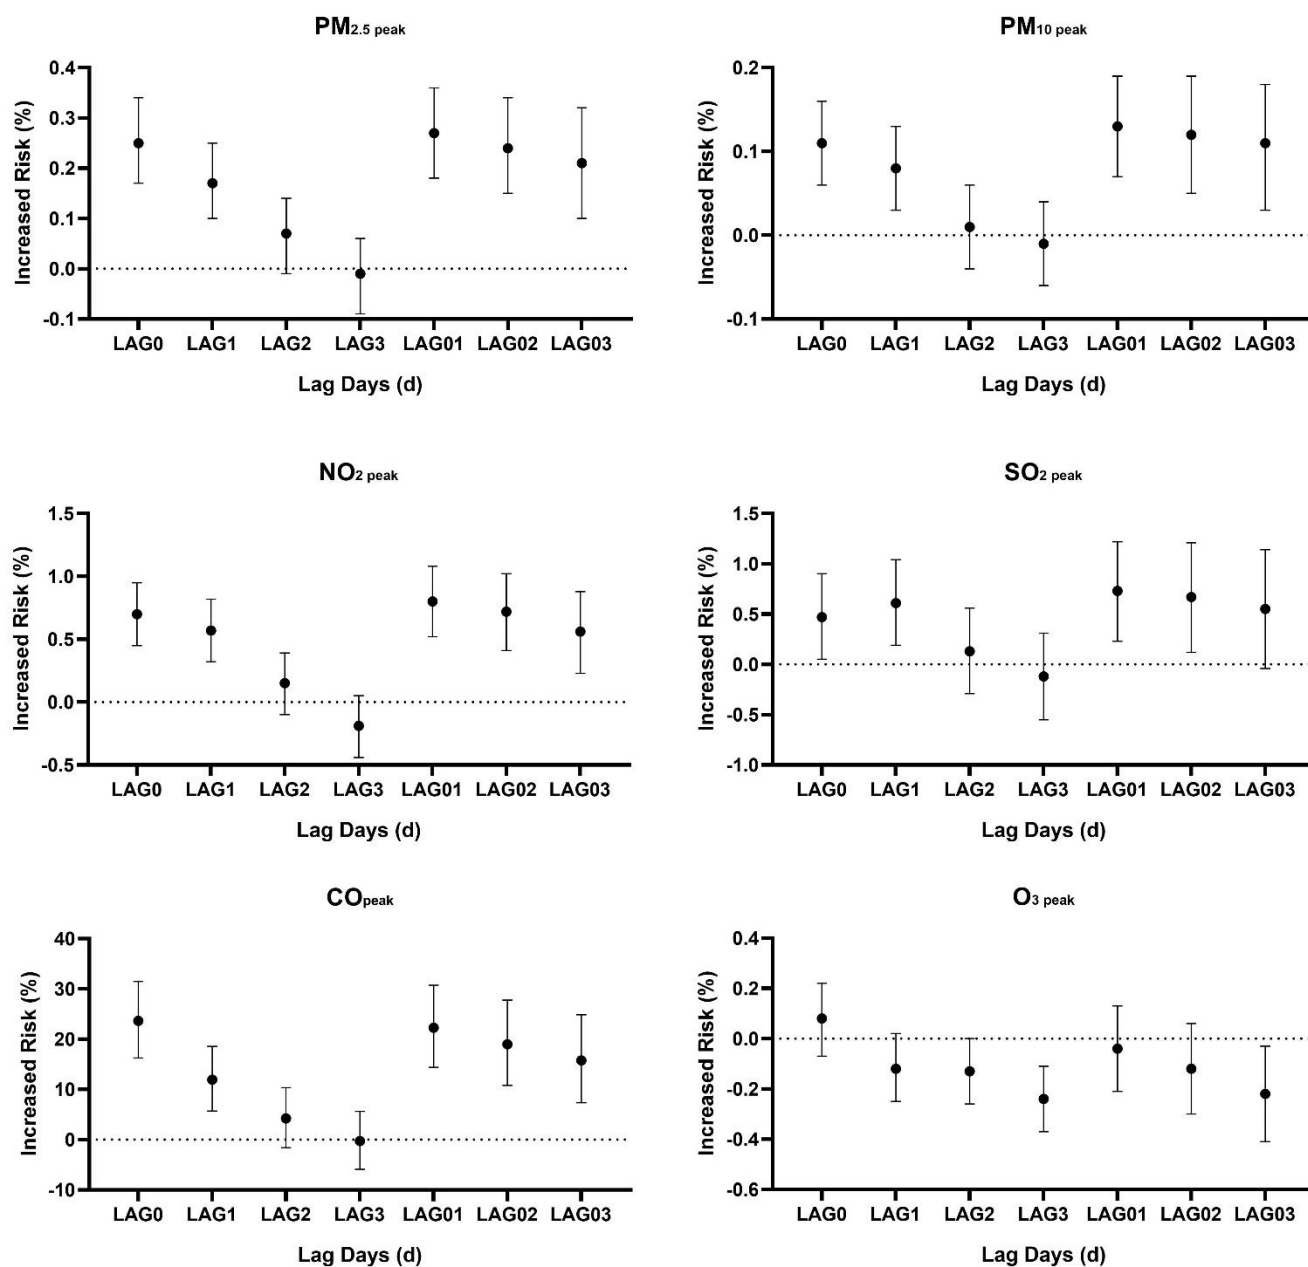

**Figure S2.** The excess risk (%) and 95% confidence interval in AMI hospital admissions for per 10 units increase in hourly peak concentration of six kinds of air pollutants in different lag days among the total population in Beijing, China.

**Table S2.** The excess risk (%) and 95% confidence interval in AMI hospital admissions for per 10 units increase in hourly peak, mean and valley concentration of six kinds of air pollutants among the total population in Beijing, China ( used alternative degrees of freedom).

| Variable                 | Excess Risk (%) | 95%CI low | 95%CI upp |
|--------------------------|-----------------|-----------|-----------|
| PM <sub>2.5</sub> valley | 0.48            | 0.33      | 0.63      |
| PM <sub>2.5</sub> mean   | 0.40            | 0.28      | 0.53      |
| PM <sub>2.5</sub> peak   | 0.23            | 0.15      | 0.32      |
| PM <sub>10</sub> valley  | 0.43            | 0.31      | 0.55      |
| PM <sub>10</sub> mean    | 0.29            | 0.20      | 0.38      |
| PM <sub>10</sub> peak    | 0.11            | 0.06      | 0.16      |
| NO <sub>2</sub> valley   | 0.78            | 0.40      | 1.17      |
| NO <sub>2</sub> mean     | 0.82            | 0.47      | 1.18      |
| NO <sub>2</sub> peak     | 0.66            | 0.39      | 0.92      |
| SO <sub>2</sub> valley   | 1.51            | 0.33      | 2.70      |
| SO <sub>2</sub> mean     | 0.78            | 0.02      | 1.54      |
| SO <sub>2</sub> peak     | 0.28            | −0.16     | 0.73      |
| CO valley                | 40.33           | 25.09     | 57.44     |
| CO mean                  | 32.49           | 20.58     | 45.58     |
| CO peak                  | 20.27           | 12.88     | 28.13     |
| O <sub>3</sub> valley    | −0.28           | −0.69     | 0.14      |
| O <sub>3</sub> mean      | 0.02            | −0.26     | 0.30      |
| O <sub>3</sub> peak      | 0.09            | −0.06     | 0.24      |
